# Supplementary material for: Clinical Evaluation of an Off-the-Shelf Allogeneic Adipose Matrix for Soft Tissue Reconstruction
Source: PubMed Central journal article supplement — Plast Reconstr Surg Glob Open. 2020 Jan 17;8(1):e2574. doi: 10.1097/GOX.0000000000002574 (PMC7015604; doi:10.1097/gox.0000000000002574), 2020-01-17
Supplement: gox-8-e2574-s001.pdf [file gox-8-e2574-s001.pdf]

| <u>PATIENT ID</u> | <u>TIME [MONTH]</u> | <u>ADIPOCYTE CHARACTERISTICS</u> |                                                                                                            | <u>MATRIX OR MATRIX-LIKE SUBSTANCE</u> |                                                       | <u>FIBROUS OR COLLAGENOUS STROMA</u> |                                                                         | <u>CAPSULE DESCRIPTION</u>     |
|-------------------|---------------------|----------------------------------|------------------------------------------------------------------------------------------------------------|----------------------------------------|-------------------------------------------------------|--------------------------------------|-------------------------------------------------------------------------|--------------------------------|
|                   |                     | <u>Adipocyte Coverage</u>        | <u>Description</u>                                                                                         | <u>Residual AAM</u>                    | <u>Description</u>                                    | <u>Stroma Deposition</u>             | <u>Description</u>                                                      |                                |
| 01                | Control             | Total                            | Even sized and normal in number                                                                            | None                                   | Absent                                                |                                      | Rare and at/around septae                                               | Absent                         |
| 01                | 2 month             | None                             | Irregularly sized with small foci and rare fat necrosis                                                    | 10-15%                                 | Located at the center                                 | 70-80%                               | Major component of overall structure                                    | Poorly demarcated capsule      |
| 01                | 3 month             | 30-40%                           | Increased adipocytic component. Slightly more even, yet smaller, adipocytes with evenly spaced capillaries | 30%                                    | Located at center                                     | 20%                                  | Surrounding the material many foci with hemosiderophages - spaced apart | Thin capsule                   |
| 01                | 3 month             | 40%                              | Increased adipocytic component. Slightly more even, yet smaller, adipocytes with evenly spaced capillaries | 10-20%                                 |                                                       | 20-30%                               | Spaced apart                                                            | Thin capsule                   |
| 02                | Control             | Total                            | Evenly sized and normal in number and appearance                                                           | None                                   | Absent                                                |                                      | Rare and at/around septae                                               | Absent                         |
| 02                | 2 month             | 10%                              |                                                                                                            | 20%                                    |                                                       | 70%                                  | Compact                                                                 | Less distinct/apparent capsule |
| 02                | 3 month             | 50%                              | More evenly distributed adipocytes with increased capillaries at the periphery                             | 10%                                    |                                                       | 40%                                  | Spaced apart                                                            | Thin capsule                   |
| 04                | 2 month             | 30-40%                           |                                                                                                            | 40%                                    |                                                       | 20-30%                               |                                                                         | Less distinct/apparent capsule |
| 04                | 6 month             | 80-85%                           | Broad distribution of adipocytes                                                                           | None                                   | Absent                                                | 10-20%                               | Mostly limited to septae                                                | Thickened fibrous septae       |
| 05                | 1 month             | 10%                              |                                                                                                            | 60%                                    | Fragmented                                            | 20-30%                               | Compact                                                                 | No distinct capsule            |
| 05                | 2 month             | 40%                              | Increased adipocytes and capillaries relative to 1 month time point                                        | 30%                                    |                                                       | 30%                                  |                                                                         | No distinct capsule            |
| 05                | 3 month             | 70%                              | Increased presence of variably-sized adipocytes with increased capillaries                                 | None                                   | Absent                                                | 20-30%                               | Limited to thickened fibrous stroma                                     | No distinct capsule            |
| 05                | 3 month             | 40%                              | Increased presence of variably-sized adipocytes with increased capillaries                                 | 40%                                    |                                                       | 20%                                  | Compact or globular with hemosiderophages                               | No distinct capsule            |
| 05                | 3 month             | 30%                              | Increased presence of variably-sized adipocytes with increased capillaries                                 | 30%                                    | More evenly digested relative to previous time points | 40%                                  | Compact or globular with hemosiderophages                               | No distinct capsule            |

| <u>PATIENT ID</u> | <u>TIME [MONTH]</u> | <u>ADIPOCYTE CHARACTERISTICS</u> |                                                                                       | <u>MATRIX OR MATRIX-LIKE SUBSTANCE</u> |                                                                    | <u>FIBROUS OR COLLAGENOUS STROMA</u> |                                                                             | <u>CAPSULE DESCRIPTION</u> |
|-------------------|---------------------|----------------------------------|---------------------------------------------------------------------------------------|----------------------------------------|--------------------------------------------------------------------|--------------------------------------|-----------------------------------------------------------------------------|----------------------------|
|                   |                     | <u>Adipocyte Coverage</u>        | <u>Description</u>                                                                    | <u>Residual AAM</u>                    | <u>Description</u>                                                 | <u>Stroma Deposition</u>             | <u>Description</u>                                                          |                            |
| 06                | 1 month             | 30%                              | Increased and variable sized adipocytes with increased capillaries                    | 10-15%                                 | Evenly digested and surrounded by inflammatory cells               | 50%                                  | Compact or globular with foci of cellular fibroblastic reaction             | Thick capsule or septa     |
| 06                | 2 month             | None                             | Not adipocytes present                                                                | None                                   | Absent                                                             | None                                 | Not applicable                                                              | Not applicable             |
| 06                | 6 month             | 80%                              | Nearly normal adipose tissue                                                          | None                                   | Absent                                                             | 10-15%                               | Mostly as septa with small globule containing collagen and many macrophages | Thickened fibrous septae   |
| 10                | 1 month             | 20%                              |                                                                                       | 50%                                    | Centralized and fragmented                                         | 20-30%                               | Globular                                                                    | No distinct capsule        |
| 10                | 2 month             | 20%                              |                                                                                       | 30%                                    | Evenly fragmented or digested and surrounded by inflammatory cells | 50%                                  |                                                                             | No distinct capsule        |
| 10                | 3 month             | 50%                              | Increased and variable sized adipocytes with increased capillaries; some fat necrosis | 5%                                     | Evenly digested                                                    | 40%                                  | Globular with some septa-like thickening                                    | Thickened fibrous septae   |
| 10                | 3 month             | 50%                              | Mostly evenly sized adipocytes present with increased capillaries throughout          | 5%-10%                                 | Evenly digested                                                    | 40%                                  | Globular                                                                    | Thickened fibrous septae   |
| 12                | 1 month             | 30%                              | Adipocytes with some presence capillaries                                             | 30%                                    | Slightly fragmented                                                | 40%                                  | Globular with some septa-like thickening                                    | Thickened fibrous septae   |
| 12                | 2 month             | 20%                              | Adipocytes with some presence capillaries                                             | 50%                                    | Slightly fragmented                                                | 30%                                  | Globular with some septa-like thickening                                    | Not applicable             |
| 12                | 6 month             | 30%                              | Increased adipocytes presence with increased capillaries relative to 1 and 2 months   | 50%                                    | Fragmented and cystic                                              | 20%                                  | Globular with some septa-like thickening                                    | Thickened capsule          |
| 13                | 1 month             | 10%                              |                                                                                       | 60%                                    | Fragmented and cystic                                              | 30%                                  | Globular and compact                                                        | Not applicable             |
| 13                | 2 month             | 30%                              |                                                                                       | 30%                                    | Fragmented and cystic                                              | 40%                                  | Globular and compact                                                        | Not applicable             |
| 13                | 3 month             | 40%                              |                                                                                       | 20%                                    | Fragmented and cystic                                              | 40%                                  | Globular and compact                                                        | No distinct capsule        |
| 13                | 3 month             | 20%                              |                                                                                       | 30%                                    | Fragmented and cystic                                              | 50%                                  | Globular                                                                    | Thin capsule               |
| 15                | 1 month             | 10%                              |                                                                                       | 20%                                    | Fragmented                                                         | 70%                                  | Globular                                                                    | Thin capsule               |
| 15                | 1 month             | 10%                              |                                                                                       | 20%                                    | Fragmented                                                         | 70%                                  | Globular                                                                    | Thin capsule               |
| 15                | 2 month             | 10%                              |                                                                                       | 20%                                    | Fragmented                                                         | 70%                                  | Globular                                                                    | No distinct capsule        |
| 15                | 6 month             | 40%                              |                                                                                       | None                                   | Absent                                                             | 60%                                  | Globular and hyalinized with milder inflammatory cells present              | No distinct capsule        |
| 15                | 6 month             | 50%                              | Increased adipocytes, slightly smaller in size and increased vessels                  | None                                   | Absent                                                             | 40%                                  | Globular and septal, with macrophages present                               | No distinct capsule        |
