# Supplementary figures and images for: Clinical Evaluation of an Off-the-Shelf Allogeneic Adipose Matrix for Soft Tissue Reconstruction
Source: PubMed Central journal article supplement — Plast Reconstr Surg Glob Open. 2020 Jan 17;8(1):e2574. doi: 10.1097/GOX.0000000000002574 (PMC7015604; doi:10.1097/gox.0000000000002574), 2020-01-17

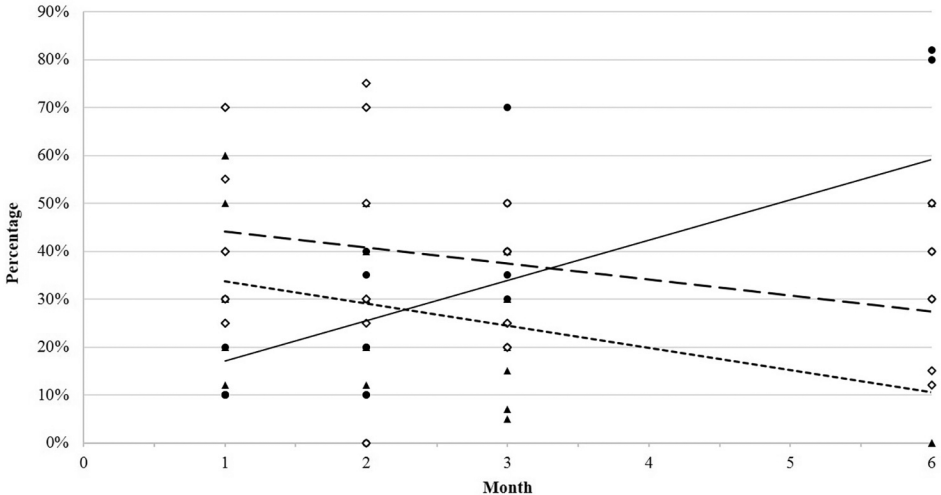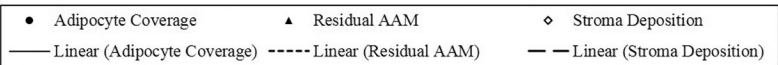

Supplement: gox-8-e2574-s002.pdf [file gox-8-e2574-s002.pdf]
